# Supplementary material for: The cerebellum and its network: Disrupted static and dynamic functional connectivity patterns and cognitive impairment in multiple sclerosis
Source: PubMed Central journal article supplement (PMC8564243; doi:10.1177/1352458521999274), 2021-03-08
Supplement: sj-pdf-1-msj-10.1177_1352458521999274.pdf [file sj-pdf-1-msj-10.1177_1352458521999274.pdf]

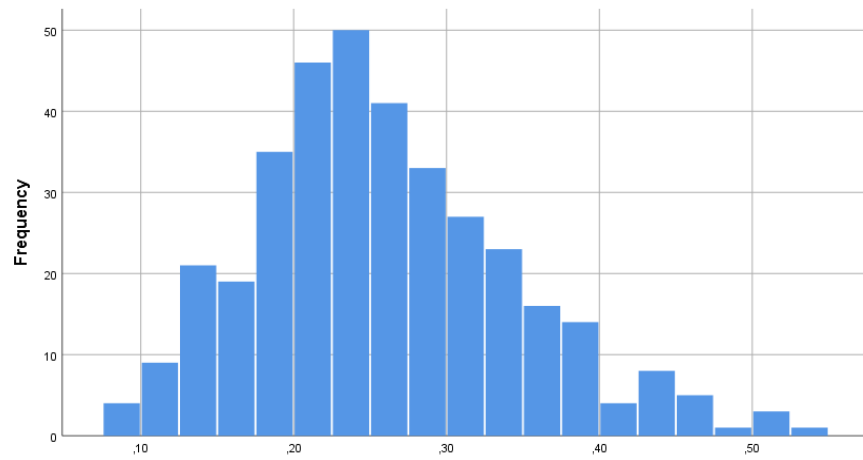

Original static FC (cerebellum - DMN)  
(Statistic 0.064,  $p=0.001$ )

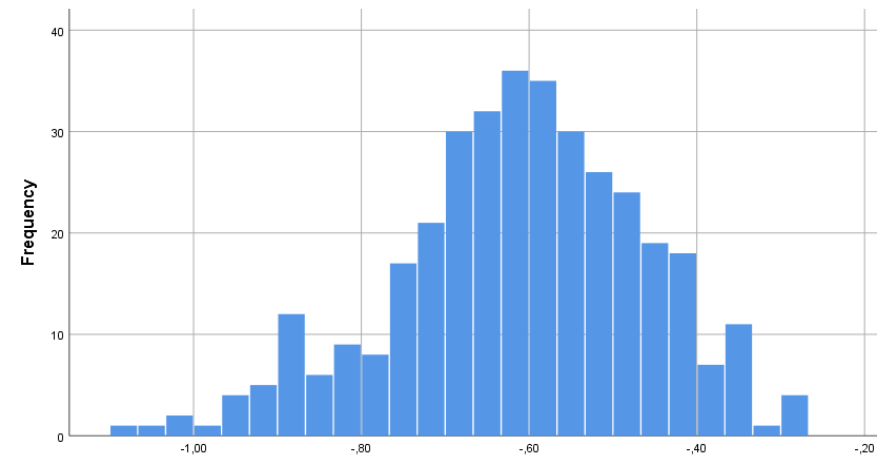

Transformed static FC (cerebellum - DMN)  
(Statistic 0.037,  $p=0.200$ )

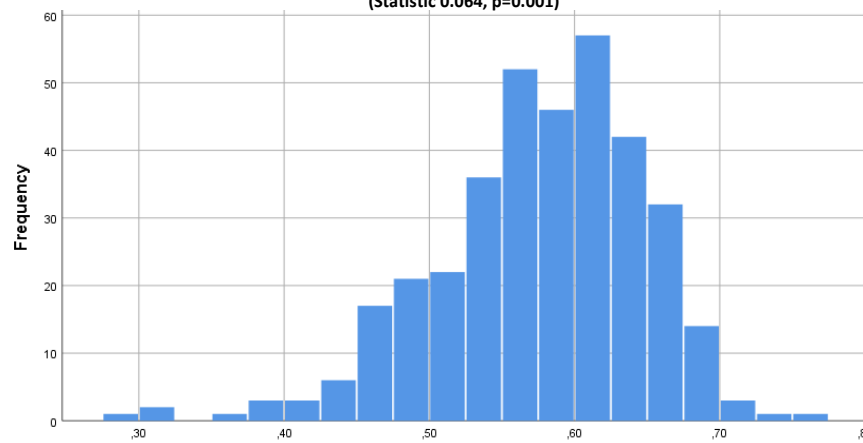

Original dynamic FC (cerebellum - DMN)  
(Statistic 0.066,  $p=0.001$ )

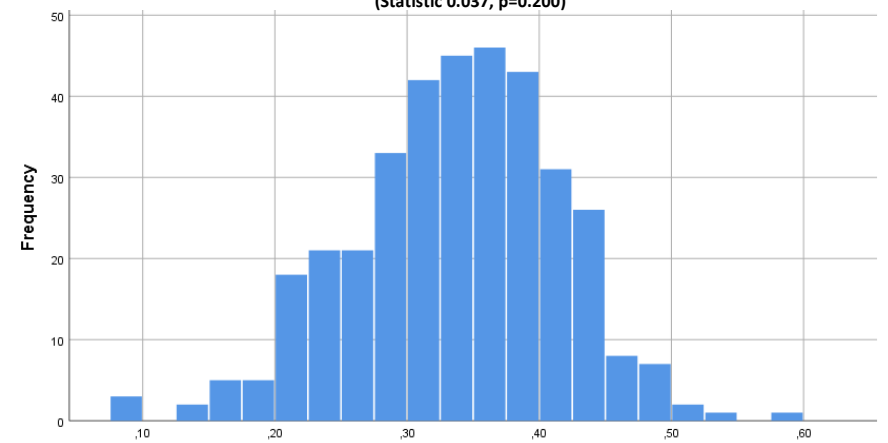

Transformed dynamic FC (cerebellum - DMN)  
(Statistic 0.044,  $p=0.095$ )

Supplementary Figure: Histograms of static and dynamic functional connectivity (FC) before (left) and after (right) transformations to ensure normal distributions. For illustrative purposes only cerebellar connections with the default-mode network (DMN) are shown. Static connectivity was transformed using  $\log_{10}(x)$ , due to the observed right-tailed distribution. Dynamic connectivity was transformed using  $x^2$ , due to the observed left-tailed distribution. Statistics represent the Kolmogorov-Smirnov test for normal distributions; significance indicates a non-normal distribution.
